# Supplementary material for: Rituximab-specific DNA aptamers are able to selectively recognize heat-treated antibodies
Source: PubMed Central journal article supplement (PMC7644011; doi:10.1371/journal.pone.0241560), 2020-11-05

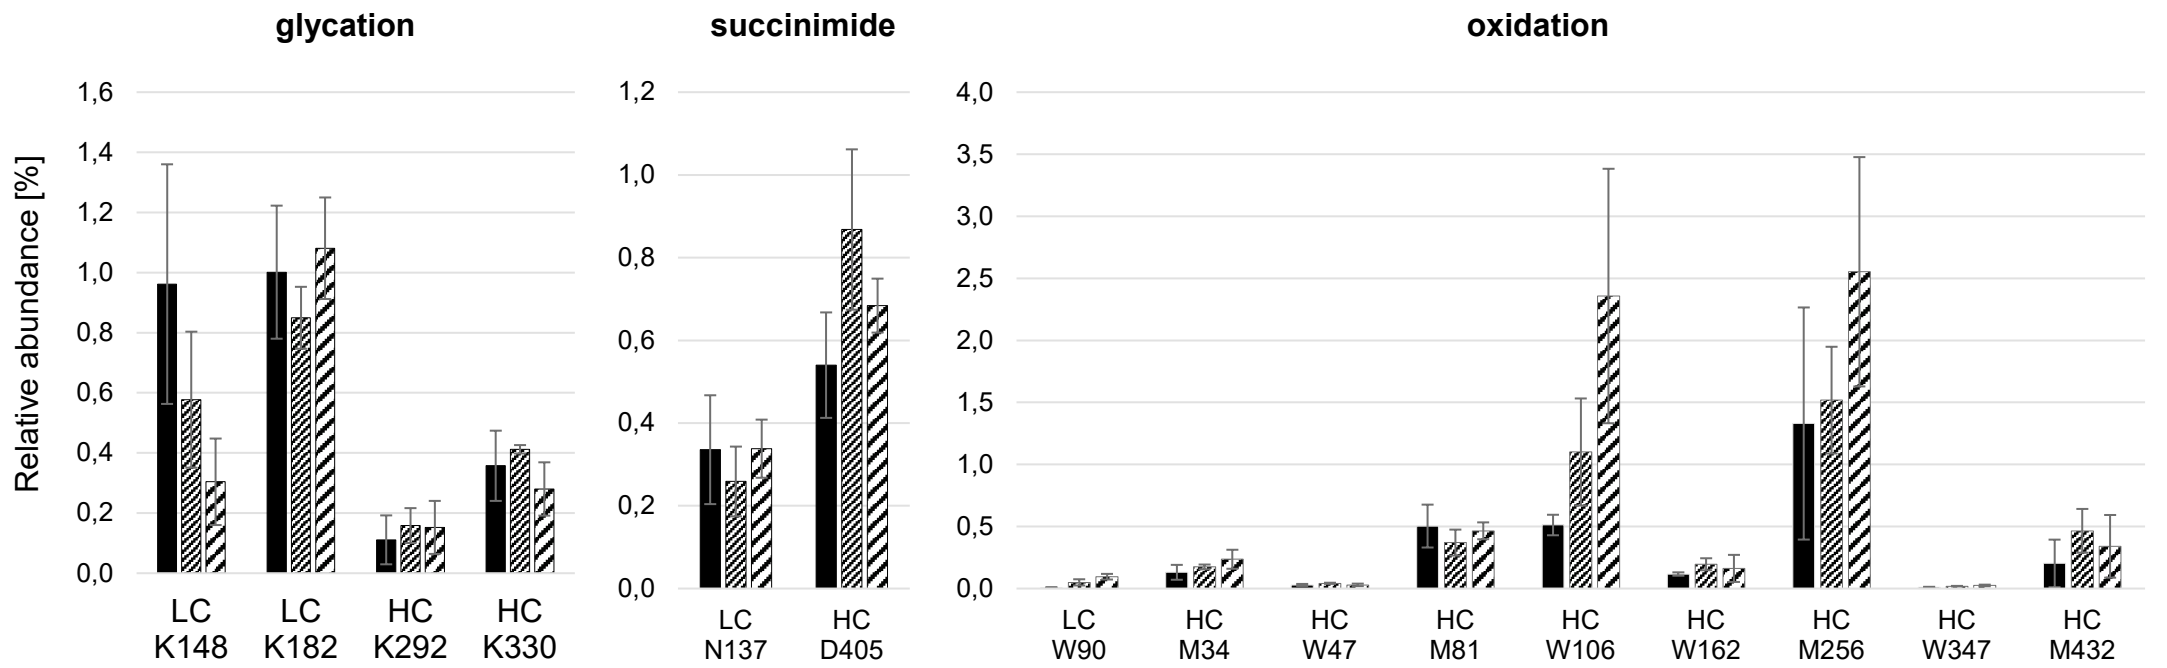

***N*-glycosylation HC N301**

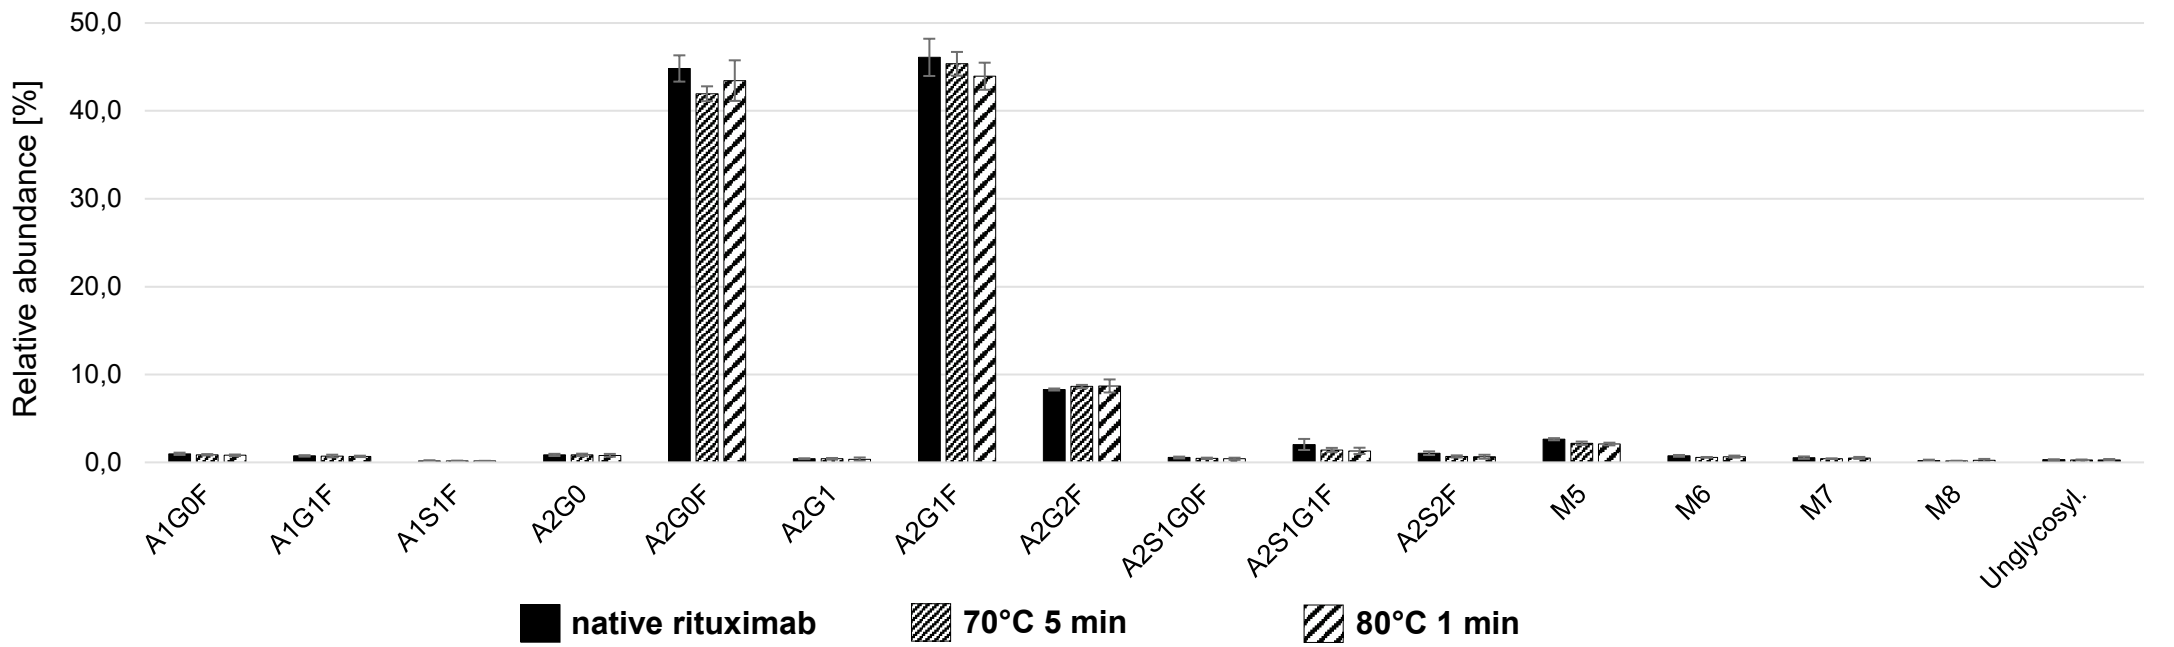

Supplement: pone.0241560.s001.pdf [file pone.0241560.s001.pdf]
